# Supplementary material for: Evidence for a Hepatitis B Virus Short RNA Fragment Directly Targeting the Cellular RRM2 Gene
Source: MDPI journal article supplement (doi:10.3390/cells11142248), 2022-07-20
Supplement: s1 [file s1]

# Evidence for a Hepatitis B Virus Short RNA Fragment Directly Targeting the Cellular RRM2 Gene

Karin Broennimann, Inna Ricardo-Lax, Julia Adler and Yosef Shaul

## Table of contents:

|                       |   |
|-----------------------|---|
| Plasmid list.....     | 2 |
| Primer sequences..... | 3 |
| Antibodies.....       | 4 |

## Supplementary figures

|                |   |
|----------------|---|
| Figure S1..... | 5 |
| Figure S2..... | 6 |
| Figure S3..... | 7 |
| Figure S4..... | 8 |

## Plasmid List.

| Plasmid name                                       | Plasmid backbone                                         | Location of insert | Insert                                                                                                                                                                              |
|----------------------------------------------------|----------------------------------------------------------|--------------------|-------------------------------------------------------------------------------------------------------------------------------------------------------------------------------------|
| Empty vector                                       | pLenti4 (Invitrogen)                                     | Gateway LR sites   | No insert                                                                                                                                                                           |
| HBx (full length) and truncated/mutated versions   | pLenti4 (Invitrogen)                                     | Gateway LR sites   | HA-tag 5' HBx (nucleotides 1374-1838) HBV 3'UTR (nucleotides 1838-1989 genotype A, adw2)                                                                                            |
| no X ORF                                           | pLenti4 (Invitrogen)                                     | Gateway LR sites   | HA-tag 5' HBV 3'UTR                                                                                                                                                                 |
| HBV                                                | pHR' CMV GFP, Inder Verma lab, Addgene plasmid # 14858   | XmaI - XhoI        | 1.3x HBV, 1.3x copies of the HBV adw2 strain from unique EcoRV site at its 5' end to the unique TaqI site at its 3' end (position 1043 and 2017 relative to EcoRI restriction site) |
| pX330-U6-Chimeric_BB-CBh-hSpCas9                   | Feng Zhang lab, Addgene 42230                            |                    | Guides were designed and inserted according to the Zhang lab protocol: <a href="https://www.addgene.org/crispr/zhang/">https://www.addgene.org/crispr/zhang/</a>                    |
| pU6-(BsaI)_CBh-Cas9-T2A-mCherry sgRNA for R2 start | pU6-(BsaI)_CBh-Cas9-T2A-mCherry Addgene plasmid # 135012 |                    | sgRNA for R2 start site                                                                                                                                                             |
| pWPI hNTCP                                         | pWPI-puro, Staphan Urban lab                             |                    |                                                                                                                                                                                     |
| pcDNA3 RRM2                                        | pcDNA3.1 (+), Edward Whang lab                           |                    |                                                                                                                                                                                     |

### **qRT-PCR Primers**

R2 fw 5'AGAGAGTAGGCGAGTATCAGAGG

rev 5'CAAGTAAGGGCACATCTTCAGTTC,

18S ribosomal RNA fw 5'TCGGAACTGAGGCCATGATTAAG

rev 5'CGGAACTACGACGGTATCTGATC

HBx 3'UTR fw 5'CATGTCCCACTGTTCAAGCC

rev 5'TCTGACGGAAGGAAAGAAGTCA

HBx ORF fw 5'CCACCGTGAACGCCCATC

rev 5'TTGTGCCTACAGCCTCCTAATAC

HBs ORF fw 5'ACATCAGGATTCCTAGGACC

rev 5'TATCGCTGGATGTGTCTGCG

hNTCP fw 5' TGCCTCAATGTTCTTCAGCC

rev 5' TGTTCAATGTTCTTCATC

R2 overexpression fw 5' TAGCCTTTGCTGCAGTGGAA

Rev 5' CCAGGCATCAGTCCTCGTTT

### **Primers and probe for detection of intra- and extracellular HBV DNA:**

5'-CCGTCTGTGCCTTCTCATCTG-3' (sense),

5'-AGTCCAAGAGTCCTCTTATGTAAGACCTT-3' (anti sense),

5-/56 FAM/CCGTGTGCA/ZEN/CTTCGCTTC ACCTCT GC/3IABkFQ/-3 (probe).

### **Primers for guides**

Guide R2 start fw: caccgACGGAGGGAGAGCATAGTGG

Guide R2 start rv: aaacCCACTATGCTCTCCCTCCGTc

**Antibodies**

Rabbit anti-RRM2 (Cell Signaling E7Y9J Rabbit mAb #65939)

Mouse anti-Actin (Sigma A4700)

Mouse anti-Vinculin (Sigma)

Horseradish peroxidase–conjugated secondary antibody (Jackson)

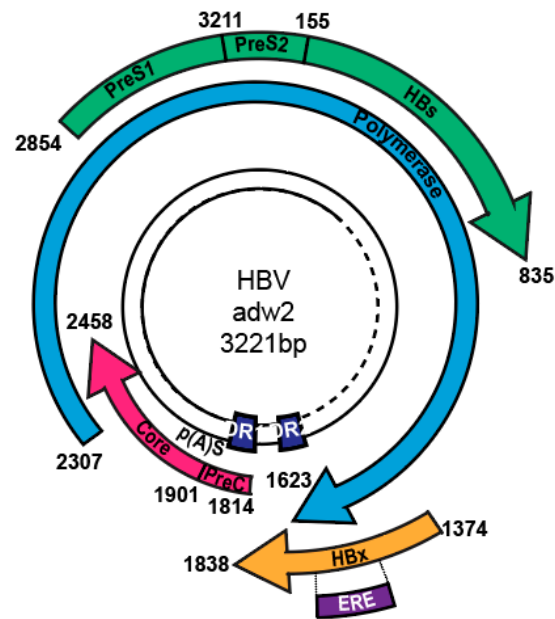

**Figure S1.** Schematic of HBV genome organization. Numbering starts from the EcoRI site. In addition to the main HBV ORFs we have depicted ERE within HBx.

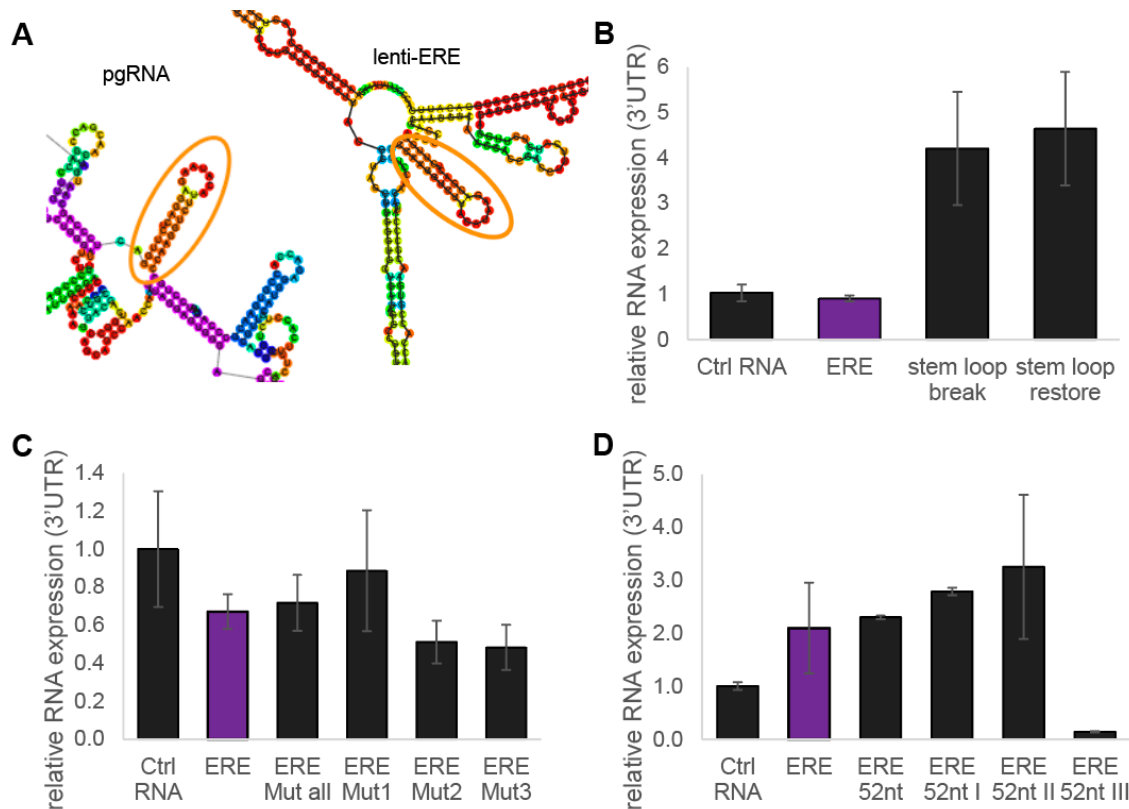

**Figure S2.** Structure predictions and RNA expression of ERE sequence analysis. (A) Structure predictions of ERE stem loop in context of HBV pgRNA and lenti-ERE sequence with RNA fold web server. (B–D) Quiescent HepG2 cells were transduced with lentivirus with the respective sequence depicted in Figure 1B. Cells were harvested three days after transduction and lentiviral expression level (3'UTR) of three biological replicates was analyzed by qRT-PCR.

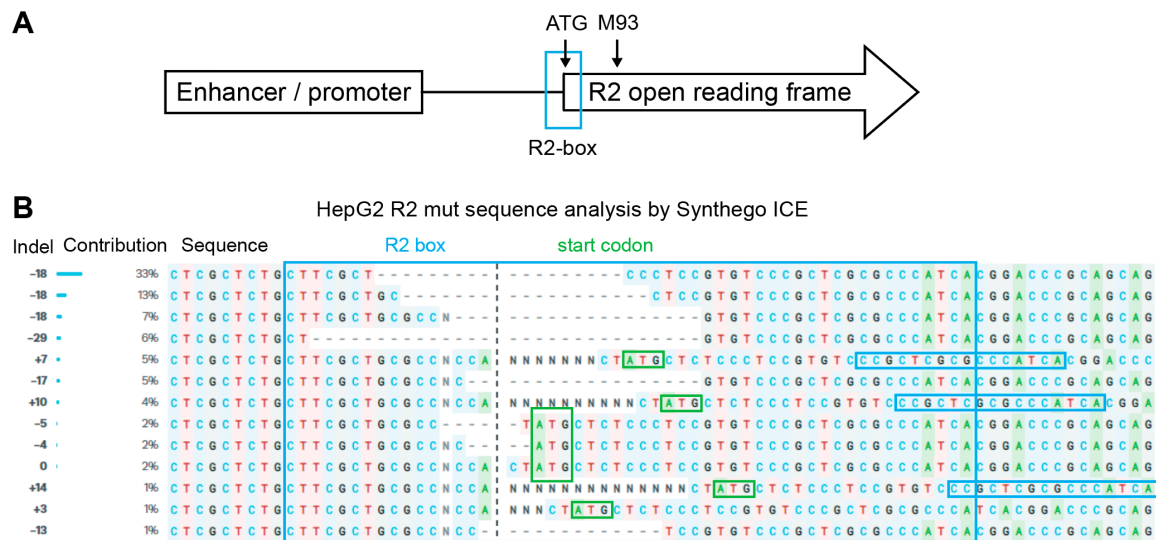

**Figure S3.** Characterization of the R2 promoter and sequence similarity between ERE and R2 gene and the HepG2 R2 box knockout cell line. (A) Schematic representation of the RRM2 (R2) locus with the R2-box in blue and the major ATG in and the downstream ATG at M93 indicated with an arrow. (B) Sequence analysis of R2 mut cells in the region around R2 translation start site by Synthego ICE web analysis tool (Synthego Performance Analysis, ICE Analysis. 2019. v2.0. Synthego).

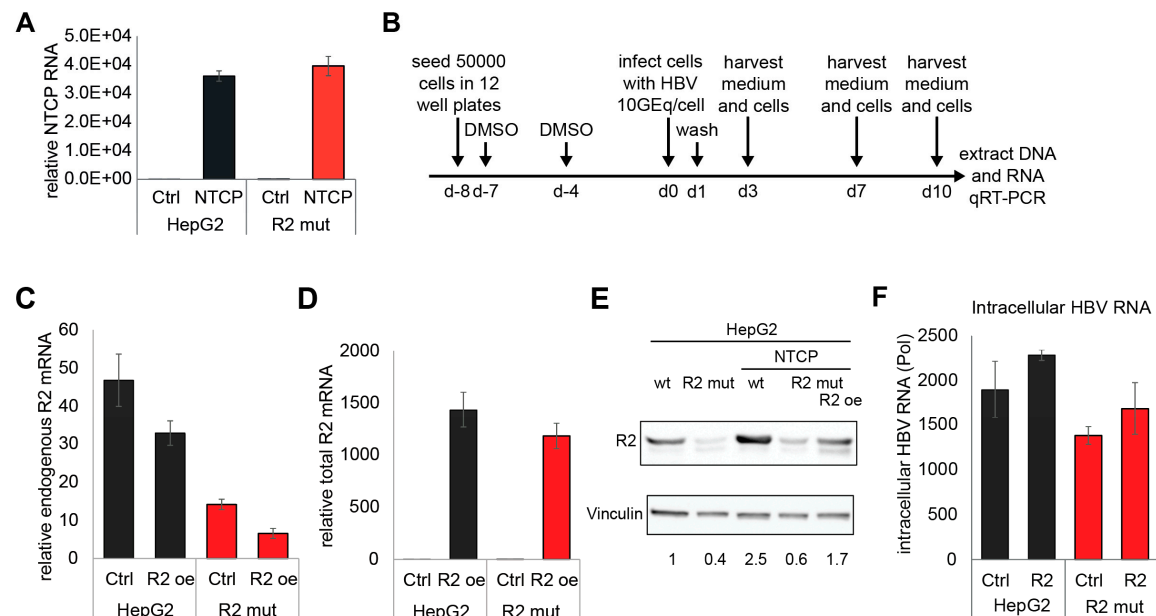

**Figure S4.** Establishment of HepG2 and HepG2 R2 mut cells that express NTCP and overexpress R2. (A) HepG2 and HepG2 R2 mutated cells that express NTCP and the original cell lines without NTCP were grown, RNA was extracted and NTCP expression was measured by qRT-PCR. (B) Schematic of experiment setup: Quiescent HepG2 and R2 mut cells expressing the NTCP receptor were infected with HBV (10 Genome Equivalents (GEq) per cell). Medium and cells were harvested on the indicated days post infection. DNA was extracted and qRT-PCR with HBV specific primers and probe was performed. (C–E) Stable cell lines expressing R2 from a CMV promoter were established. Quiescent cells were harvested and qRT-PCR with primers specific for the endogenous R2 only (C) or together with the ectopically expressed R2 (D) and WB of R2 were performed. (F) Experiment described in panel (B) was performed with the R2 overexpression cell lines and qRT-PCR of intracellular HBV RNA was performed.
